# Supplementary material for: High-throughput identification and rational design of synergistic small-molecule pairs for combating and bypassing antibiotic resistance
Source: PLoS Biol. 2017 Jun 20;15(6):e2001644. doi: 10.1371/journal.pbio.2001644 (PMC5478098; doi:10.1371/journal.pbio.2001644)
Supplement: S3 Table — FICI scores were determined as described in Materials and Methods. The color scheme is the same as in Fig 1D: predicted synergizers are colored green, the positive control is colored purple, and predicted non-synergizers are colored blue. FICI ≤ 0.5 is considered synergistic. (XLSX) [file pbio.2001644.s008.xlsx]

## Sheet: Sheet1
Small molecule	Measurement #1	Measurement #2	Measurement #3
AZIDOTHYMIDINE	0.5	0.5
BICYCLOMYCIN	0.375	0.5
CHLORAMPHENICOL	1	1.25
CIPROFLOXACIN	1	1.01
ETHIDIUMBROMIDE	1	0.5	1
LEVOFLOXACIN	0.53125	1
MECILLINAM	1.5	1
MITOMYCIN	0.75	0.75
MMS	1	0.75
NALIDIXICACID	1.01	1.01
NITROFURANTOIN	1	0.75
NORFLOXACIN	1	1
PMS	1.01	1.01
PYOCYANIN	1.01	1
STREPTONIGRIN	1.01	0.75
SULFAMONOMETHOXINE	0.75	1.003
TRIMETHOPRIM	0.1562	0.25	0.3125
A22	0.75	0.75
ACRIFLAVINE	0.75	0.75
ACTINOMYCIND	1.5	1.5
AMIKACIN	0.75	0.5	0.625
AMOXICILLIN	1.5	1.5
AMPICILLIN	1.5	2.5
AZITHROMYCIN	1	1
AZTREONAM	1.008	2.5
BACITRACIN	1.01	1.01
BENZALKONIUM	0.75	0.75
BLEOMYCIN	1	0.625
CARBENICILLIN	2.5	1.5
CCCP	0.625	1.01
CECROPINB	0.75	1
CEFACLOR	0.5	0.625	0.625
CEFOXITIN	1.01	1.01
CEFSULODIN	1.01	1.02
CEFTAZIDIME	1.01	3
CERULENIN	1.5	1.5
CHLOROPROMAZINE	1.01	0.75
CISPLATIN	0.75	0.625
CLARYTHROMYCIN	1.01	1.01
CYCLOSERINE D	1.01	1.01
DIBUCAINE	1	1
DOXORUBICIN	1.003	1.01
DOXYCYCLINE	1.01	1.01
EDTA	1	0.503
EGCG	0.51	0.5	0.5625
EGTA	1.01	0.515
EPINEPHRINE	1	1
ERYTHROMYCIN	1.01	1
FOSFOMYCIN	0.75	3
FUSIDICACID	1.001	1
GENTAMICIN	0.625	0.5	0.625
HIGHCOBALT	0.5625	0.5	0.75
HIGHCOPPER	1.5	1
HIGHNICKEL	0.53125	1.01
HYDROXYUREA		1
INDOLICIDIN	1.01	1
ISONIAZID	0.75	0.5	0.75
LOWFE	0.625	1
METHOTREXATE	1.01	1.01
MINOCYCLINE	1.01	1.01
NACL	1.01	0.75
NIGERICIN	0.625	1.01
NOREPINEPHRINE	1.01	0.75
NOVOBIOCIN	1.01	1.01
OXACILLIN	1.01	1.02
PARAQUAT	1	1.02
PEROXIDE	1	1
PHLEOMYCIN	0.625	0.625
POLYMYXINB	1	0.5	0.75
PROCAINE	1.02	4.01
PUROMYCIN	1.01	1.01
RIFAMPICIN	2.5	1.5
SPECTINOMYCIN	1.5	1
SPIRAMYCIN	0.75	1
STREPTOMYCIN	1.5	0.75
TETRACYCLINE	2	1.5
THEOPHYLLINE	1.01	1.01
TOBRAMYCIN	1.5	0.5625
TRICLOSAN	0.502	0.5625
VANCOMYCIN	1	1
VERAPAMIL	0.625	0.625
