# Supplementary material for: High-throughput identification and rational design of synergistic small-molecule pairs for combating and bypassing antibiotic resistance
Source: PLoS Biol. 2017 Jun 20;15(6):e2001644. doi: 10.1371/journal.pbio.2001644 (PMC5478098; doi:10.1371/journal.pbio.2001644)
Supplement: S4 Table — FICI scores were determined as described in Materials and Methods. FICI ≤ 0.5 is considered synergistic. (XLSX) [file pbio.2001644.s009.xlsx]

## Sheet: Sheet1
	replicate #1	replicate #2
predicted synergizers	FICI90	FICI90
carbetapentane citrate	0.5625	0.75
carboplatin	1	1
cinoxacin	1.06	1
dapsone	0.1875	0.15625
edoxudine	0.625	0.5625
flumequine	1.01	1.02
mitoxanthrone HCl	0.375	0.25
nitrofurantoin	0.625	0.75
patulin	1.01	1.01
phthalylsulfacetamide	0.25	0.1875
phthalysulfathiazole	0.1875	0.1875
sanguinarine sulfate	0.625	0.625
sulfabenzamide	0.1875	0.1875
sulfacetamide	0.1875	0.15625
sulfaphenazole	0.25	0.1875
sulfapyridine	0.125	0.1875
tinidazole	1.01	1.01
tyrothricin	0.5	1
	replicate #1	replicate #2
negative control	FICI90	FICI90
azlocillin sodium	1.06	1.06
clindamycin	1.01	1.01
flumequine	1.01	1.02
piperazine	1.01	0.52
sanguinarine sulfate	1.01	0.625
bithionate sodium	1	0.75
anazoline phosphate	1.01	1.01
benserazide	0.75	1
cloxyquine	0.75	0.75
disulfram	1.01	1.01
clemastine	0.51	0.5625
dicyclomine	2.01	0.5625
